# Supplementary material for: Aryl hydrocarbon receptor activity downstream of IL-10 signaling is required to promote regulatory functions in human dendritic cells
Source: PubMed Central journal article supplement — Cell Rep. 2023 Mar 3;42(3):112193. doi: 10.1016/j.celrep.2023.112193 (PMC10066577; doi:10.1016/j.celrep.2023.112193), 2023-03-03
Supplement: mmc1.pdf [file mmc1.pdf]

**Cell Reports, Volume 42**

**Supplemental information**

**Aryl hydrocarbon receptor activity downstream  
of IL-10 signaling is required to promote  
regulatory functions in human dendritic cells**

**Daniele Avancini, Alessandro Testori, Lucia Fresolone, Grazia Andolfi, Michela Vuono, Vittorio Martinelli, Francesca R. Santoni de Sio, and Silvia Gregori**

Figure S1

A

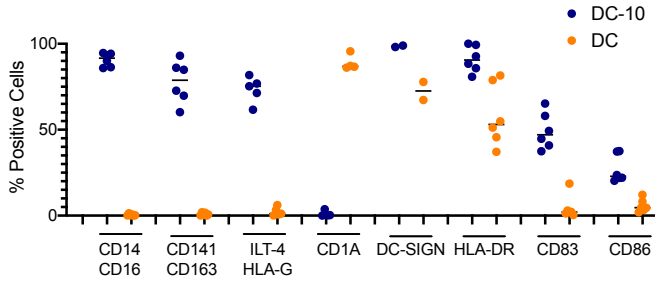

B

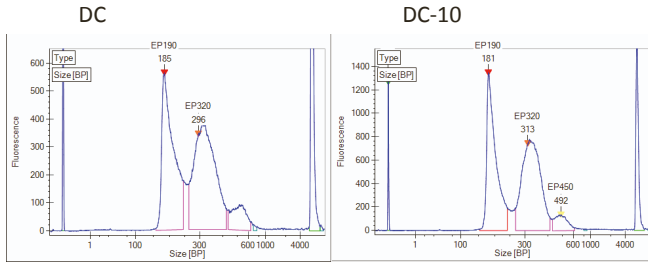

C

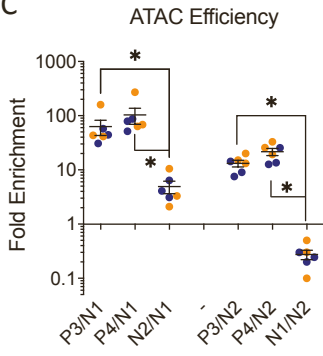

D

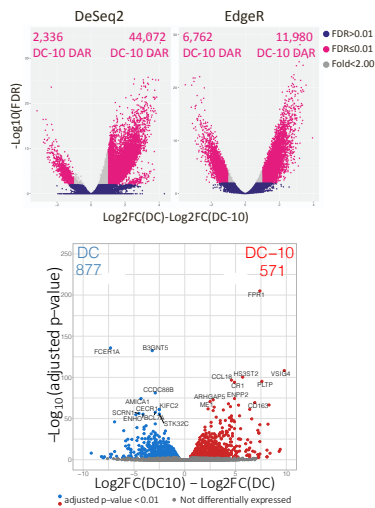

E

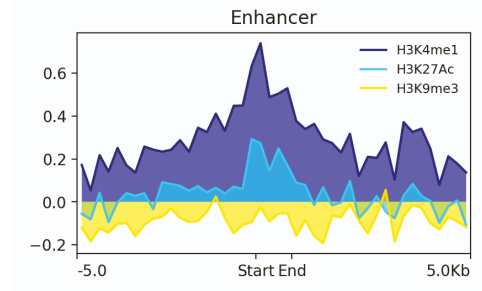

F

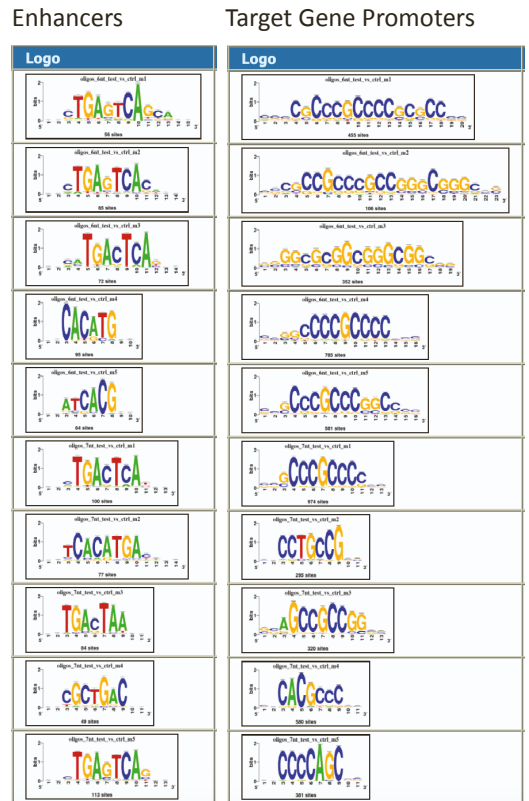

G

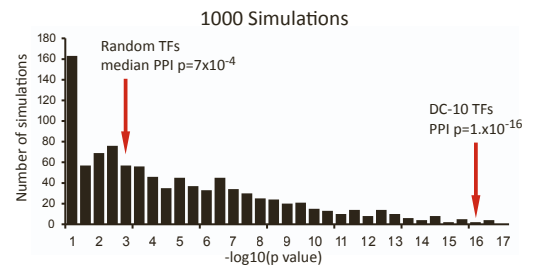

**Figure S1. Relative to Figure 1 *IL-10 Impacts Chromatin and Transcription in DCs***

A) Flow Cytometry profile of DC-10 (blue) and DC (orange) samples used for ATAC- and RNA-seq (n=6). Percentage of cells positive for indicated markers is shown.

B-C) ATAC Efficiency of tagmentation (B) and enrichment of accessible genomic sites (C) in DC-10 (blue) and DC (orange) samples. B) Electropherograms of purified ATAC libraries showing DNA sizes corresponding to 1-, 2- and 3-nucleosome stretches for DC and DC-10 samples. C) Droplet Digital PCR analysis with primers amplifying accessible (P3, P4) or non-accessible (N1, N2) regions in hematopoietic cells (Grbesa et al. 2017, *Journal of Visualized Experiments*, <https://doi.org/10.3791/56313>). Fold enrichment is expressed as the ratio between positive and negative signals (number of positive molecules *per* mL in accessible regions/number of positive molecules *per* mL in non-accessible regions) normalized to the average of the ratios between negative and negative signals (number of positive molecules *per* mL in non-accessible regions/number of positive molecules *per* mL in non-accessible regions; set as 1). *p*-values by Wilcoxon matched pairs test.

D) ATAC-seq (top) and RNA-seq (bottom) volcano plots of DC-10 vs. DC samples. Top plots display differentially accessible genomic regions (DAR) (pink) by DESeq2 and edgeR algorithms. Bottom, differentially expressed genes (DEG) (red) by DESeq2 with top 10 DEG name per group indicated. The number of DAR and DEG per group are indicated.

E) Feature alignment of CHIP-seq results obtained for the 3 indicated histone marks in DC-10 on the 107 DC-10 enhancers (start-end of the sequences are indicated).

F) Motif logos of the 10 most enriched motifs in enhancer and target gene promoter regions found using the RSAT tool.

G) PPI *p*-values obtained by the STRING tool in 1000 simulations performed with TFs randomly chosen from the ENCODE human TF list.

Figure S2

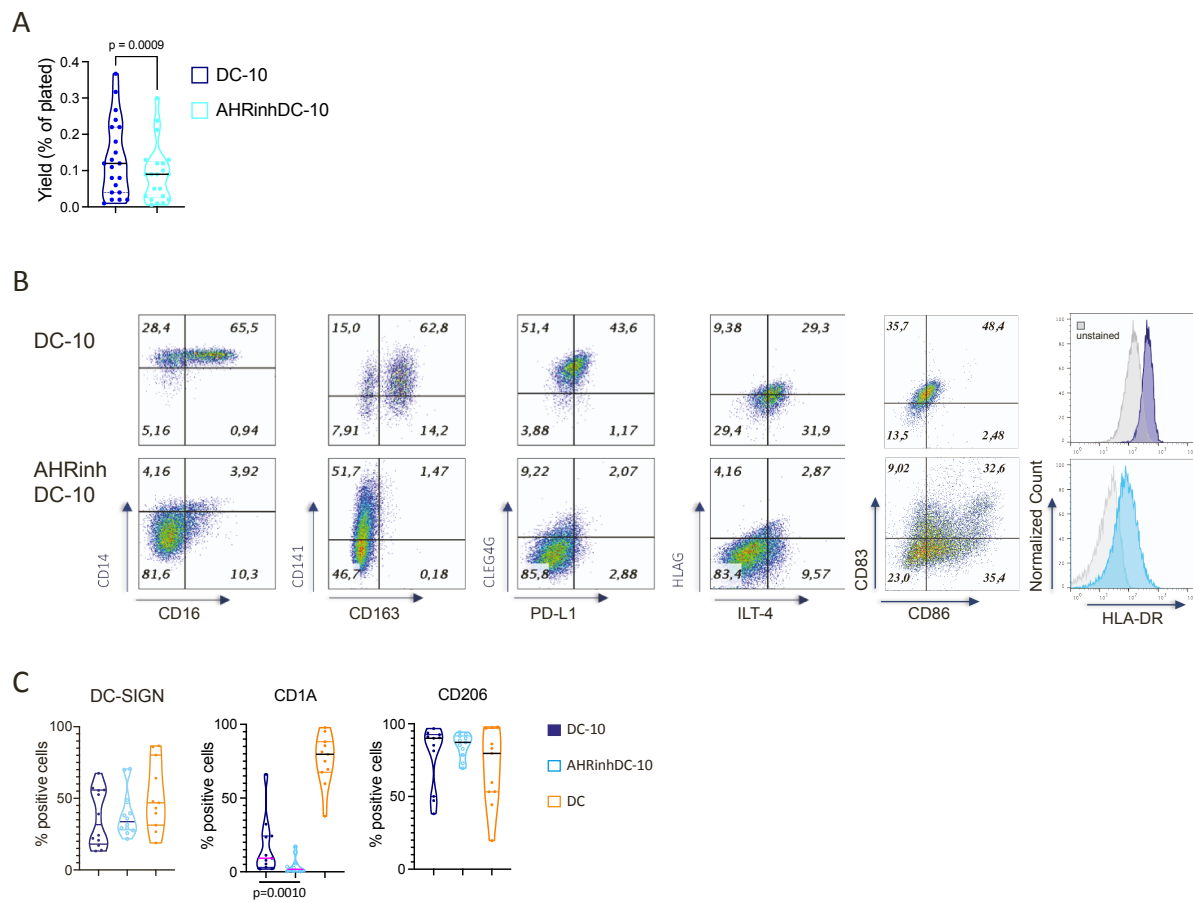

**Figure S2. Relative to Figure 2 AHR activity characterizes IL-10 induced toIDC**

CD14<sup>+</sup> monocytes isolated from peripheral blood (PB) were differentiated *in vitro* for 7 days in the presence of GM-CSF, IL-4 and IL-10 with (AHRinhDC-10) or without (DC-10) the AHR inhibitor (AHRinh) CH223191 (20 $\mu$ M).

A) Cell yield upon 7 days of DC-10 (blue) and AHRinhDC-10 (light blue) differentiation. Yield is expressed as number of recovered cells/number of plated cells (n=21).

B) Representative flow cytometric plots showing the expression of the indicated markers in DC-10 (top) and AHRinhDC-10 (bottom).

C) Percentage of DC-10 (blue), AHRinhDC-10 (light blue) and DC (orange) expressing the DC differentiation markers DC-SIGN (CD209), CD1a and CD206 analyzed by flow cytometry (n=11-12).

p values by Wilcoxon matched pairs test.

Figure S3

A

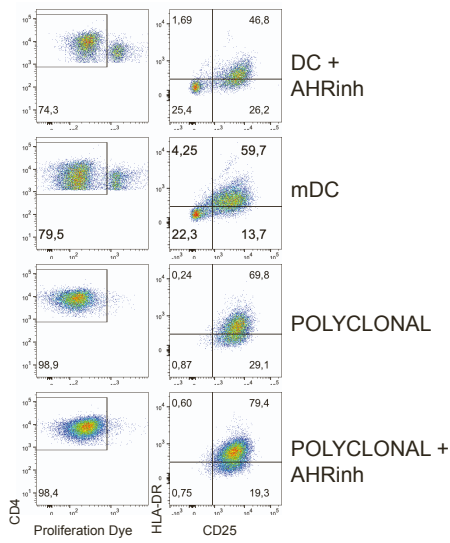

B

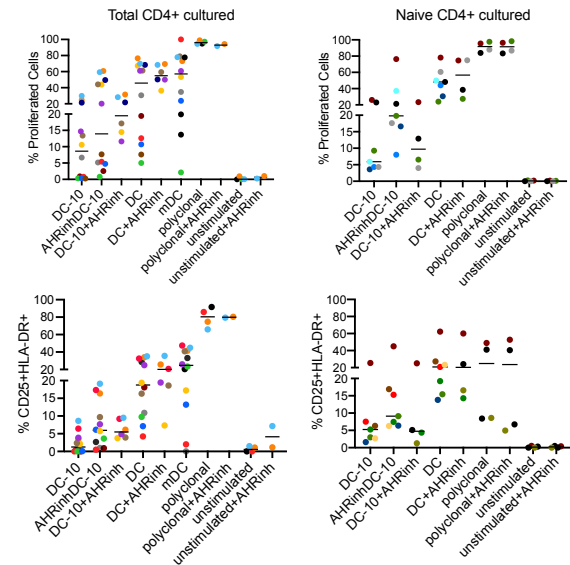

C

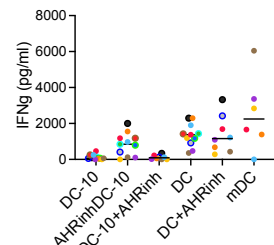

D

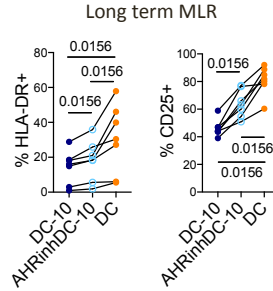

E

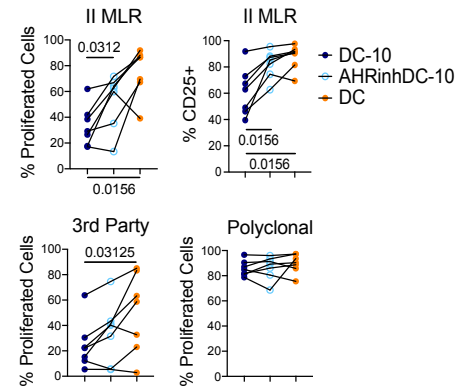

**Figure S3. Relative to Figure 3 *AHR activation is necessary for IL-10 induced tolerogenic functions in tolDCs generated in vitro***

A-C) Short-term MLR. Allogeneic CD4<sup>+</sup> T cells were stimulated *in vitro* with the indicated DC. After 5 days, T cell proliferation and activation were tested by flow cytometry and IFN $\gamma$  production in culture supernatants was tested by ELISA.

A) Representative flow cytometric plots showing the expression of the indicated markers in CD4<sup>+</sup> T cells stimulated with DC in the presence of the AHR inhibitor CH223191 (20 $\mu$ M), mDC or with anti-CD3/anti-CD28 coated beads (Polyclonal) in the absence or presence of AHR inhibitor CH223191 (20 $\mu$ M).

B) Raw percentages of proliferating (top) and CD25<sup>+</sup>HLA-DR<sup>+</sup> (bottom) CD4<sup>+</sup> cells in MLR of total (left) and naïve (right) CD4<sup>+</sup> cells stimulated by the indicated DC. Each color represents an independent donor, line at median.

C) IFN $\gamma$  ELISA quantification in culture supernatants of T cells stimulated by the indicated DC. Each color represents an independent donor, line at median.

D-E) Long-term MLR and II MLR. Long-term MLR: allogeneic CD4<sup>+</sup> T cells were stimulated by the indicated DC. The percentage of proliferating and Tr1 cells was assessed after 10 days by flow cytometry. II MLR: CD4<sup>+</sup> T cells primed in I MLR by the indicated DC were re-stimulated with mature DC derived from the same donor used in I MLR. After 3 days of re-stimulation, proliferation by flow cytometry and cytokine production by ELISA on culture supernatants were assessed.

D) Raw percentages of CD25<sup>+</sup> and HLA-DR<sup>+</sup> cells in I long-term MLR of T cells stimulated with the indicated DC.

E) Top, raw percentages of proliferating (left) and CD25<sup>+</sup> (right) CD4<sup>+</sup> cells after II MLR. Bottom, percentage of proliferating CD4<sup>+</sup> upon stimulation with third party donor mature DC (left) and polyclonal stimulation by anti-CD3/anti-CD28 coated beads (right). Blue dots = T cells stimulated in I MLR by DC-10; light blue dots = T cells stimulated in I MLR by AHRinhDC-10; orange dots = T cells stimulated in I MLR by DC.

*p*-values by Wilcoxon matched pairs test.

Figure S4

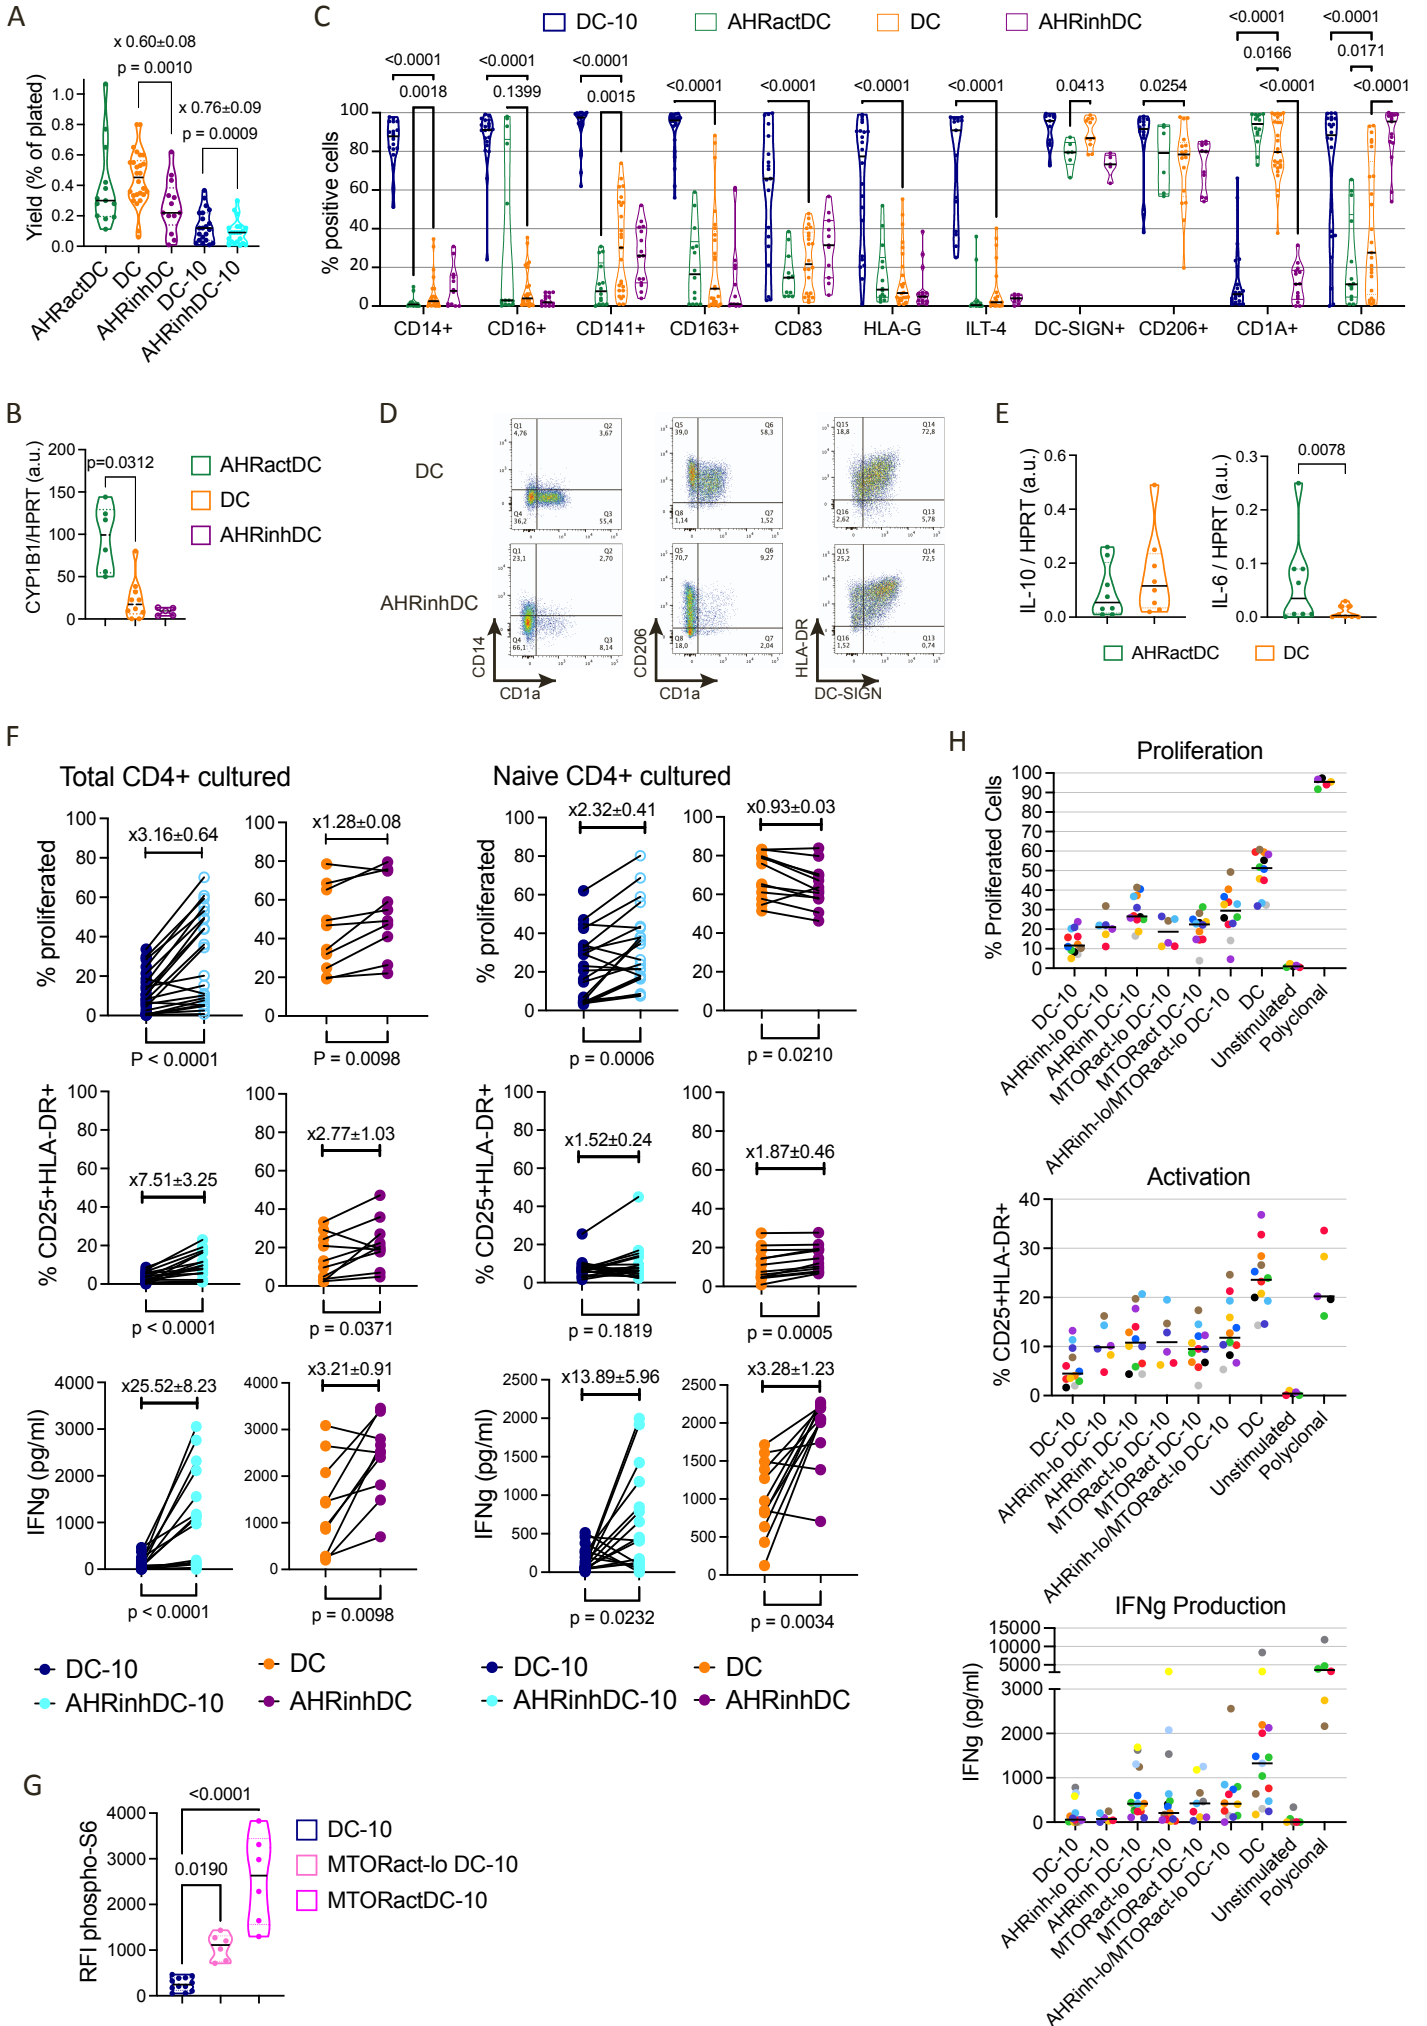



**Figure S4. Relative to Figure 4 AHR induced tolerogenic features are dependent on IL-10 and MTOR pathway inhibition**

CD14<sup>+</sup> monocytes isolated from peripheral blood (PB) were differentiated *in vitro* for 7 days in the presence of GM-CSF, IL-4 and IL-10 (DC-10), GM-CSF and IL-4 without (DC) or with the AHR agonist ITE (30 $\mu$ M) (AHRactDC) or the AHR inhibitor CH223191 (20 $\mu$ M) (AHRinhDC).

A) Cell yield upon 7 days of AHRactDC (green), DC (orange) and AHRinhDC-10 (plum) differentiation. Yield is expressed as number of recovered cells/number of plated cells. To allow direct comparison, yield of DC-10 (blue) and AHRinhDC-10 (light blue), already shown in Fig. S2A, are reported. *p*-values by Wilcoxon matched pairs test and mean fold change $\pm$ SEM are indicated.

B) Expression of the CYP1B1 gene in AHRactDC (green), DC (orange) and AHRinhDC (plum) by ddPCR. The ratio of molecules per  $\mu$ L amplified by CYP1B1 primers / molecules per  $\mu$ L amplified by HPRT primers is shown in arbitrary units (n=6-10). *p*-values by Wilcoxon matched pairs test.

C) Violin plots displaying the median  $\pm$  interquartile range of the percentage of positive cells expressing the indicated marker by flow cytometry in AHRactDC (green), DC (orange) and AHRinhDC (plum) at 7 days of differentiation (n=11-25). *p* values by Mixed effect model with Geisser-Greenhouse correction followed by Sidak's multiple comparison test (comparing each group against DC).

D) Representative flow cytometry plots showing the expression of the indicated markers in DC (top panels) and AHRinhDC (bottom panels).

E) Expression of the IL-10 (top) and IL-6 (bottom) gene in AHRactDC (green) and DC (orange) by ddPCR. The ratio of molecules per  $\mu$ L amplified by IL-10 or IL-6 primers / molecules per  $\mu$ L amplified by HPRT primers is shown in arbitrary units (n=8). *P*-values by Wilcoxon matched pairs test.

F) Side-by-side comparison of T cell proliferation, activation and IFN $\gamma$  production obtained in short term MLR assays by stimulating T cells with DC-10 (blue) vs AHRinhDC-10 (light blue) (n=16-22) and DC (orange) vs AHRinhDC (plum) (n=10-12). Results after co-culture of total (left panels) and naive (right panels). Percentages of proliferating (top) and CD25<sup>+</sup>HLA-DR<sup>+</sup> activated (middle) CD4<sup>+</sup> cells, assessed by flow cytometry; IFN $\gamma$  production (bottom), assessed in the culture supernatant by ELISA. *p*-values by Wilcoxon matched pairs test and mean fold change $\pm$ SEM are indicated.

G) Phosphorylated-S6 (phospho-S6) fluorescence intensity (RFI, relative to unstained) DC-10 (blue), MTORact-lo DC-10 (pink) and MTORactDC-10 (magenta), assessed by flow cytometry at day 2 of differentiation. *P* values by Kruskal-Wallis test followed by Dunn's multiple comparison test (n=6-12).

H) Raw percentages of proliferating (top) and CD25<sup>+</sup>HLA-DR<sup>+</sup> (middle) CD4<sup>+</sup> cells, and IFN $\gamma$  quantification in culture supernatants (bottom) in MLR of CD4<sup>+</sup> cells stimulated by the indicated stimulus. Each color represents an independent donor, line at median.

Figure S5

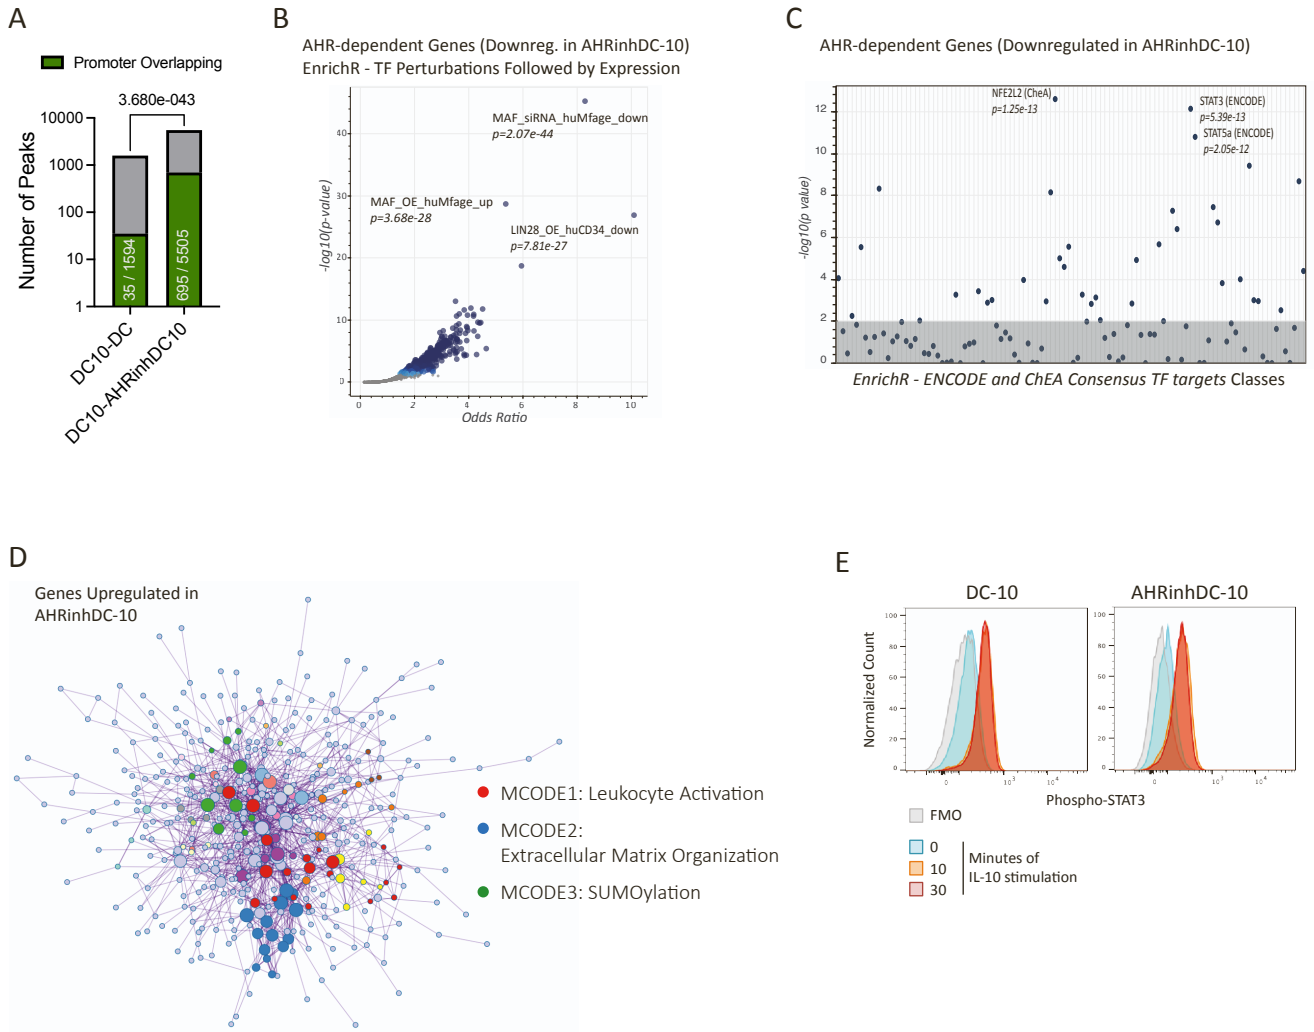

**Figure S5. Relative to Figure 5 AHR activity controls IL-10-induced gene expression patterns**

A) Number of DC-10-specific peaks obtained from the comparison with DC (*in vitro* DC-10 vs. DC; DC10-DC) and AHRinhDC-10 (*in vitro* DC-10 vs. AHRinhDC-10; DC10-AHRinhDC10) (grey) and fraction of these peaks overlapping with mapped coding gene promoters (green bars). *p*-value by Fisher's exact test.

B, C) Enrichr gene enrichment analysis of genes downregulated in AHRinhDC-10 compared to DC-10. Top 3 classes with relative *p*-values are shown. B) Volcano plot of transcription factor perturbation followed by gene expression categories and C) Manhattan plot of ENCODE and ChEA transcription factor consensus target genes categories.

D) Gene enrichment analysis of genes upregulated in AHRinhDC-10 compared to DC-10: protein-protein interaction network components by MCODE Metascape algorithm. Top 3 MCODE component nodes are colored. MCODE1 (red) = GO:0002274 (myeloid leukocyte activation), GO:0002366 (leukocyte activation involved in immune response), GO:0002263 (cell activation involved in immune response); MCODE2 (blue) = R-HSA-1474244 (Extracellular matrix organization), R-HSA-1474290 (Collagen formation), R-HSA-1650814 (Collagen biosynthesis and modifying enzymes); MCODE3 (green) = R-HSA-3108232 (SUMO E3 ligases SUMOylate target proteins), R-HSA-2990846 (SUMOylation), R-HSA-3899300 (SUMOylation of transcription cofactors). GO = Gene Ontology; R-HSA = Reactome Gene Sets. GO categories associated to all MCODEs are described in Table S5.

E) Representative flow cytometry histograms of phospho-STAT3 analysis in DC-10 (left) and AHRinhDC-10 (right) incubated with IL-10 for the indicated times. Fluorescence minus one (FMO) signal is also shown.

Figure S6

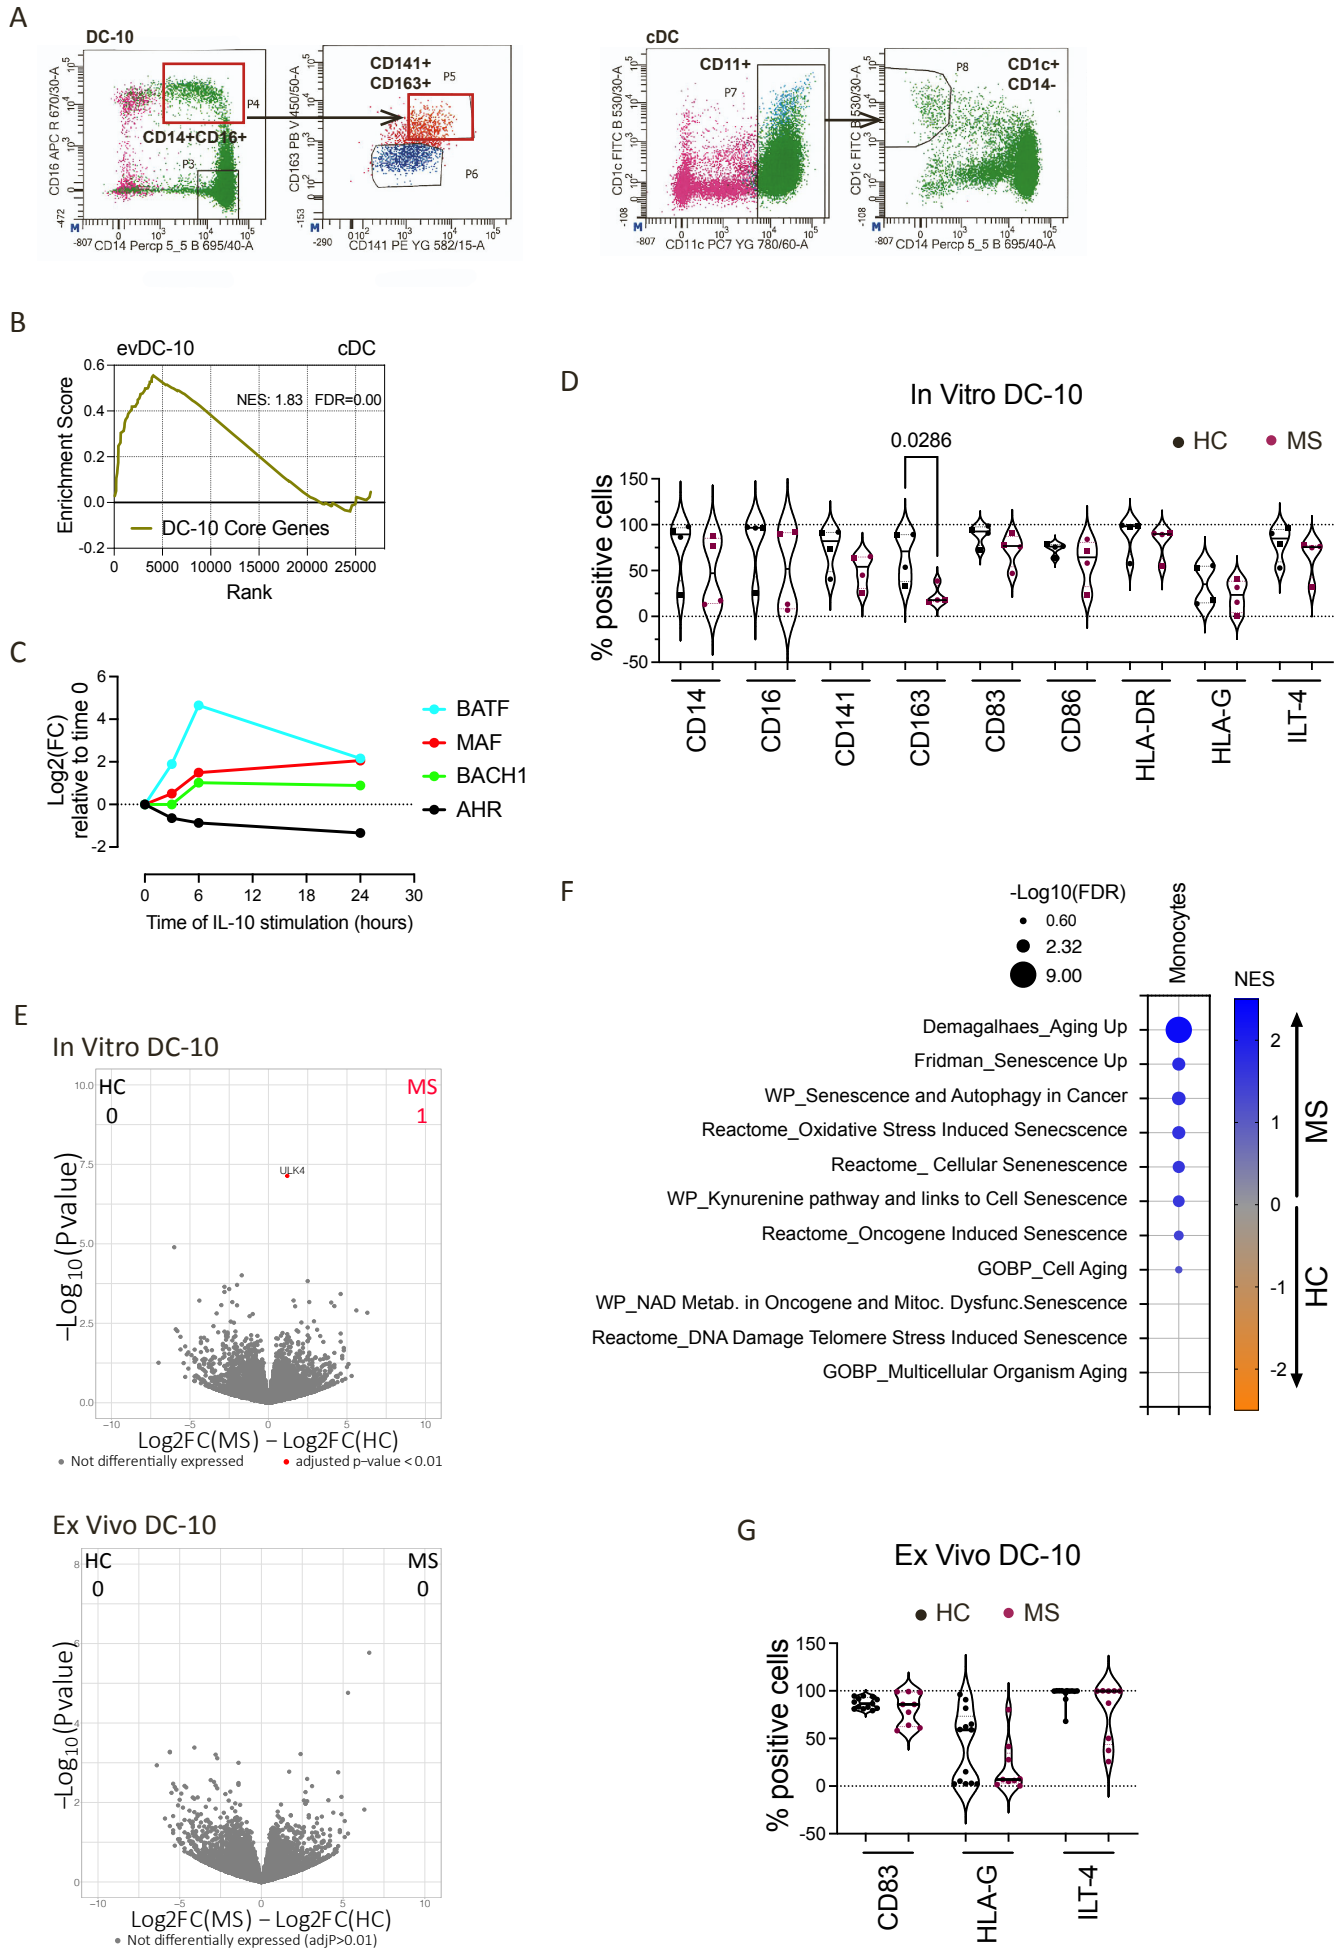

**Figure S6. Relative to Figure 6 *IL-10/AHR signature is active in vivo and is altered in autoimmune conditions***

- A) Representative flow cytometry plots showing the sorting strategy for evDC-10 (left panels, red gates) and cDC (right panels) isolation from peripheral blood. Arrows represent sub-gating. Antibody and fluorochrome are shown on the axes.
- B) GSEA of 91 DC-10 Core Genes (Table S1) in evDC-10 vs. cDC transcriptomes. Normalized enrichment score (NES) and FDR q value are reported. Leading-edge subset genes: 44.
- C) Kinetic of expression upon IL-10 stimulation of the indicated transcription factors expressed as Log<sub>2</sub> (Fold Change) versus time 0 monocytes (dotted line), assessed in Microarray data GSE82316.
- D) Percentage of cells positive for the indicated markers in DC-10 differentiated from monocytes isolated from HC and MS donors (n=4). *p*-value by Mann-Whitney test.
- E) RNA-seq volcano plots displaying differentially expressed genes (DEG) (red, adjusted *p*<0.01) by DESeq2, with top 10 DEG per group indicated, in MS vs. HC *in vitro* (top) and *ex vivo* (bottom) DC-10. The number of DEG in each group is indicated.
- F) Normalized enrichment score (NES, color scale) and -Log<sub>10</sub>(FDR) (dot size) by GSEA of the indicated senescence-associated molecular signatures (see table S3) in the transcriptomes of MS and HC monocytes. FDR > 0.25 are not shown.
- G) Percentage of circulating DC-10 expressing the indicated markers in healthy controls (HC) and multiple sclerosis (MS) donors by flow cytometry (n=9-13).
